# Supplementary material
Source: publisher figshare collection journal article supplement (https://acs.figshare.com/ndownloader/files/3966283)
Supplement: Supplementary file 1 [file 3966283]

## Supporting Information

### **Microcantilevers Bend to the Pressure of Clustered Redox Centers**

**Eric R. Dionne,<sup>a</sup> Violeta Toader,<sup>b</sup> and Antonella Badia\*<sup>a</sup>**

<sup>a</sup> *Department of Chemistry and FRQNT Center for Self-Assembled Chemical Structures, Université de Montréal, C.P. 6128, succursale Centre-ville, Montréal, QC H3C 3J7, Canada. E-mail: antonella.badia@umontreal.ca*

<sup>b</sup> *Center for Self-Assembled Chemical Structures, Department of Chemistry, McGill University, 801 Sherbrooke Street West, Montréal, QC H3A 2K6, Canada.*

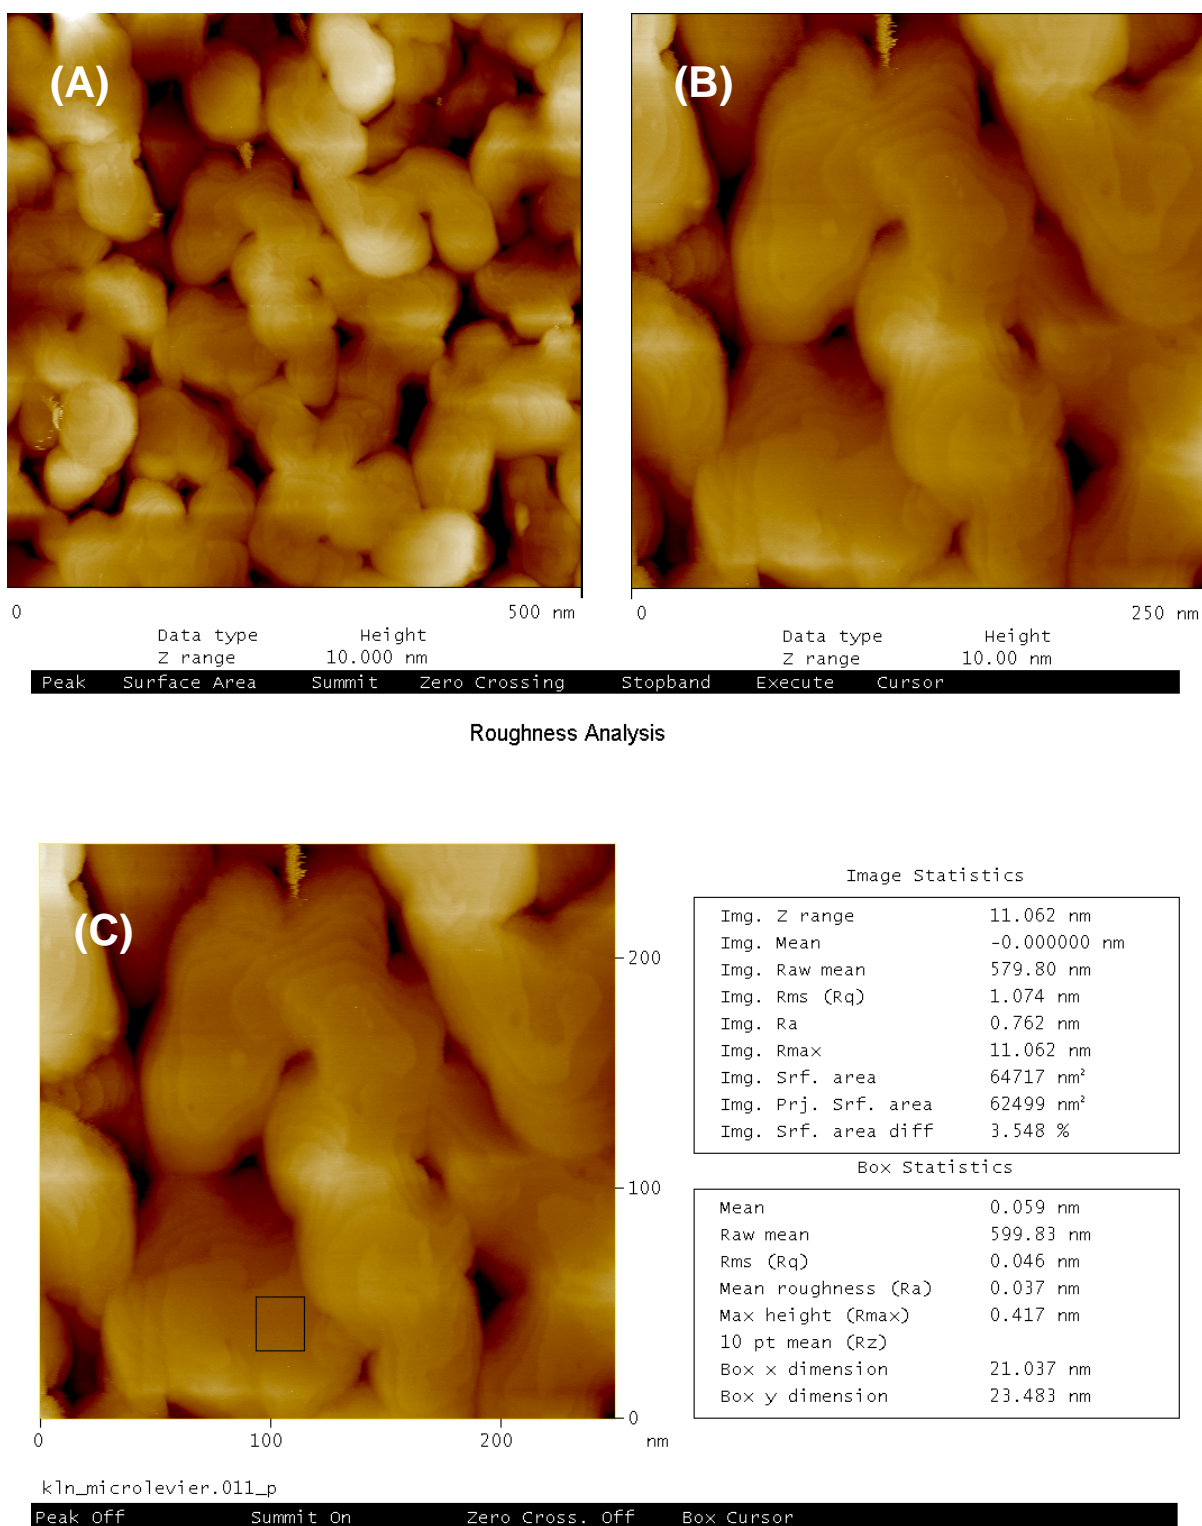

**Figure S1.** STM images of the morphology of a 50 nm-thick gold film deposited on the silicon nitride microlever chip substrate. Images were acquired in air with a Pt/Ir tip. Tip bias = 497 mV and tunneling current = 620 pA. (A) 500 nm × 500 nm, (B) 250 nm × 250 nm, and (C) roughness analysis on a terrace of a single grain. Image statistics box indicates a root mean square roughness (Rms) of 1.074 nm over the 250 × 250 nm<sup>2</sup> area and the box statistics shows a Rms of 0.046 nm over the terrace outlined by the black box.

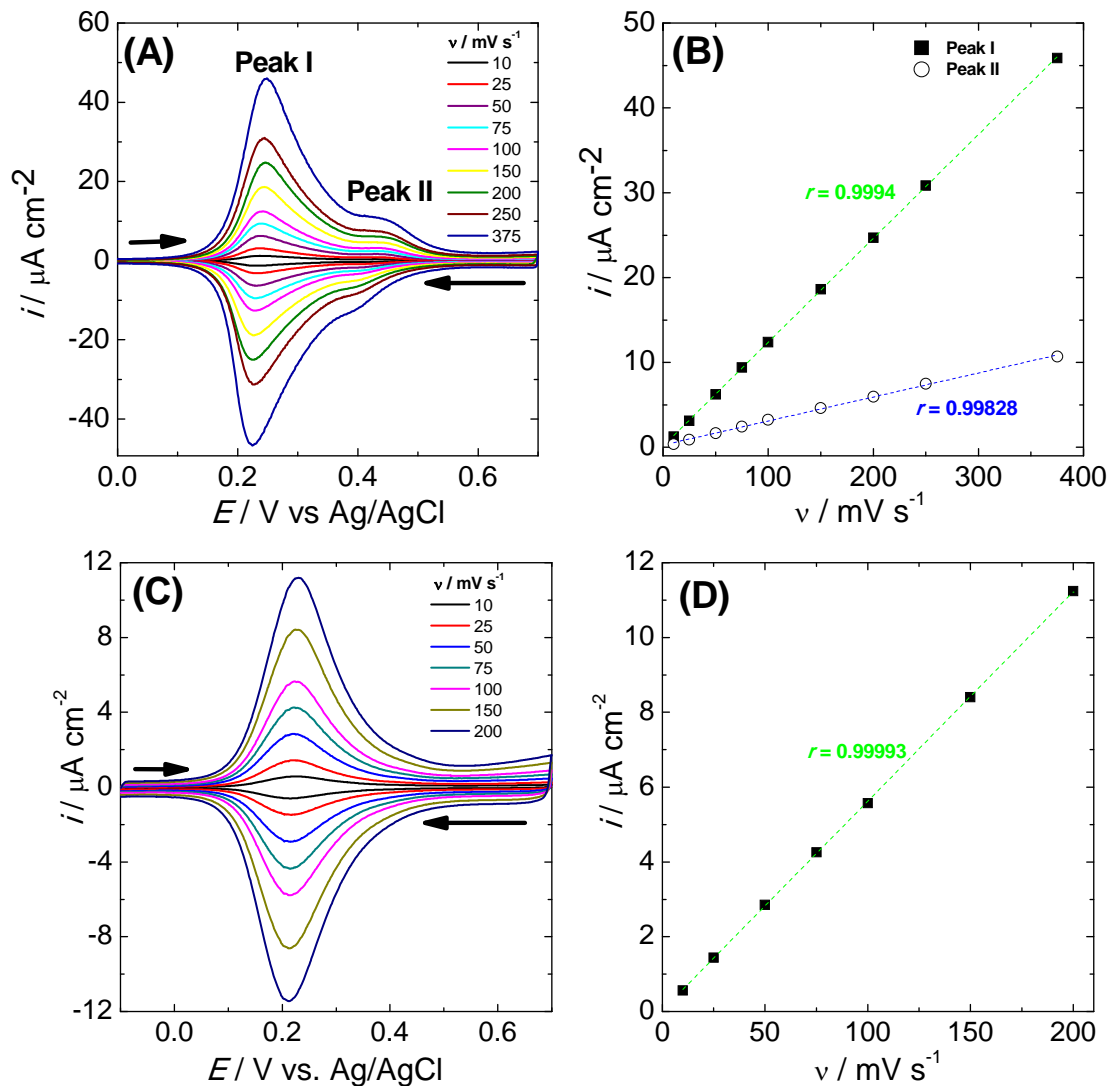

**Figure S2.** FcC<sub>12</sub>SAu SAMs formed on gold-coated silicon wafers (Ti and Au layer thicknesses of 2 nm and 60 nm, respectively) in 0.100 M NaClO<sub>4</sub>/0.010 M HClO<sub>4(aq)</sub>. Cyclic voltammograms as a function of the scan rate for (A)  $\chi_{\text{Fc}}^{\text{soln}} = 0.2$  ( $\chi_{\text{Fc}}^{\text{surf}} = 0.46$ ) and (B)  $\chi_{\text{Fc}}^{\text{surf}} = 0.1$  ( $\chi_{\text{Fc}}^{\text{surf}} = 0.21$ ) respectively. The arrows indicate the direction of potential cycling. Corresponding plots of the anodic peak current density  $i$  as a function of the scan rate  $\nu$ , (B) and (D).

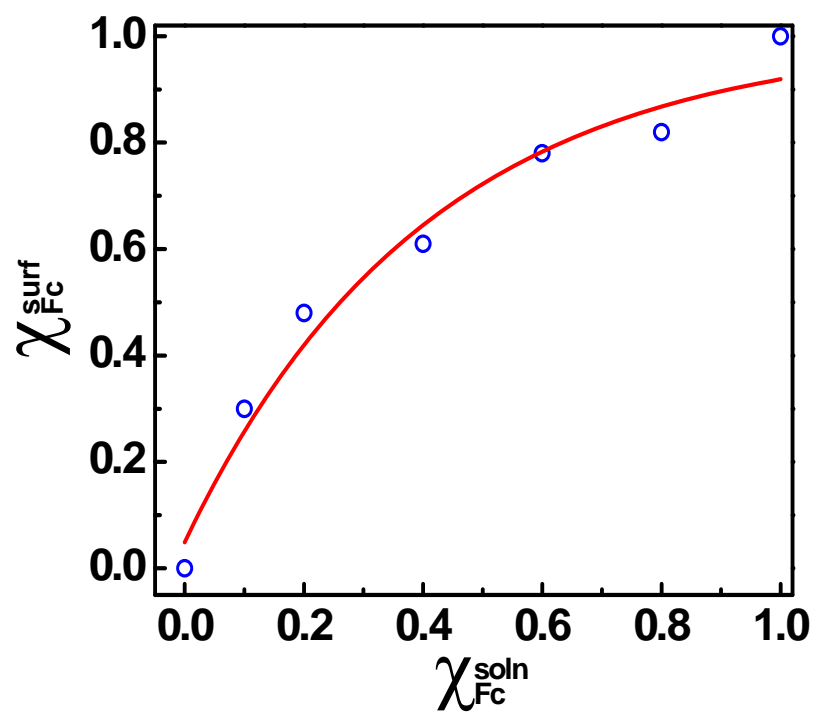

**Figure S3.** Plot of the surface mole fraction of chemisorbed  $\text{FcC}_{12}\text{SAu}$  ( $\chi_{\text{Fc}}^{\text{surf}}$ ) as a function of the mole fraction of ferrocenyldodecanethiol in solution ( $\chi_{\text{Fc}}^{\text{soln}}$ ).

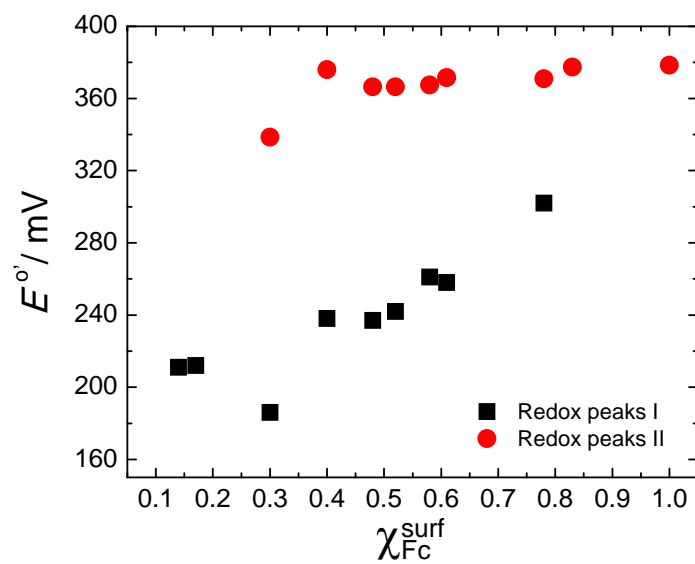

**Figure S4.** Plot of the measured SAM redox potential ( $E^{\circ'}$ ) for redox peaks I and redox peaks II as a function of the surface mole fraction of ferrocene.  $E^{\circ'}$  is the average of the anodic (oxidation) and cathodic (reduction) peak potentials.

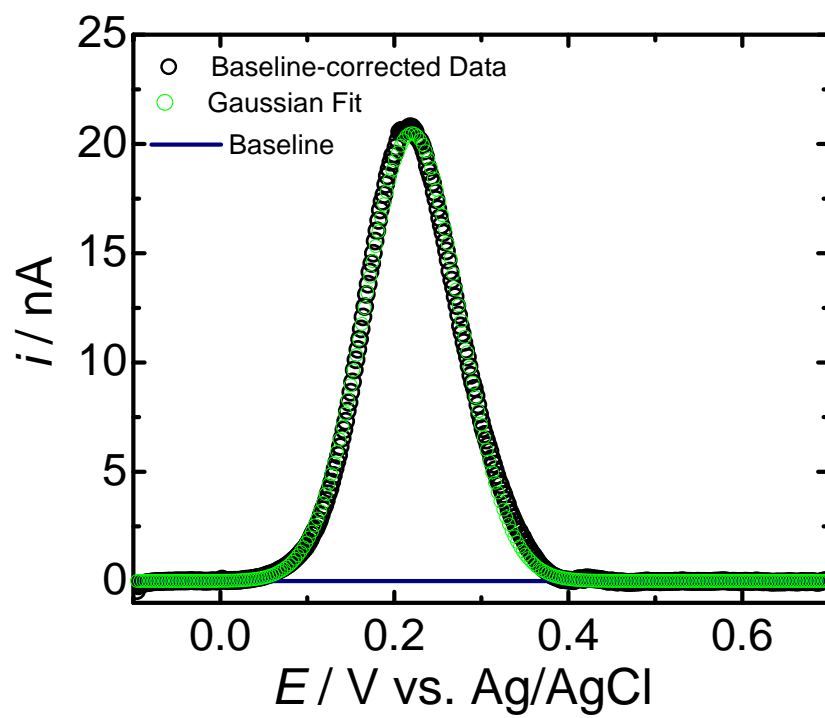

**Figure S5.** Gaussian fit of the anodic voltammogram for  $\chi_{\text{Fc}}^{\text{surf}} = 0.17$ .
